# Supplementary material for: Parallel Relaxation of Stringent RNA Recognition in Plant and Mammalian L1 Retrotransposons
Source: PubMed Central journal article supplement — Mol Biol Evol. 2012 Jul 13;29(11):3255–9. doi: 10.1093/molbev/mss147 (PMC3472496; doi:10.1093/molbev/mss147), 2012-07-13
Supplement: supp_mss147_FigS1.pdf [file supp_mss147_FigS1.pdf]

Figure S1. Comparisons of the 3' end-sequences between SINEs and LINES

MIR(SINE) : L2(LINE)

```

MIR          CAAGTTACT-TAACCTCTCTGTGCCTCAGTTTCCTCATCTGTAATAATGGGGATAA
L2B          CCTGCCACTCTGGGTTATMATTGTCT--GTKNGCANGTCTGTCTCCCCCACTGGA
          * * *** * * * ** * * * * * * * * * * *
MIR          TAATAGTACCTACCTCATAGGGTGTGTGAGGATTAATGAGTTAATACATGTAAGCG
L2B          CTGTGAGCTCCGCGAGGGCAGGG-ACTGTGTCTGTCTTGTCCACTGTATCCCAGCG
          * * * * * * * * * * * * * * * * * * * * *
MIR          CTTAGAACAGTGCCTGGCACATAGTAAGCGCTCAATAAATGTTGGTT--ATTA-----
L2B          CCTAGCACAGTGCCTGGCACATAGCAGGCGCTCAGTAAATGTTTGTGAATGAATGAA
          * ** * ** * ** * ** * ** * ** * ** * ** *
    
```

MIR(SINE) : THER1/THER1\_MD(SINE) : MON1(SINE)

```

MIR          -----ACAGTATAGCATAGTGGTTAAGAGCACGGACTCTGGAGCCAGACTG-CCTGGG
THER1        TGAGGCAGCTAGGTGGCGCAGTGGATA-GAGCGCTGGACCTGGAGTCAGGAAGACCTGAG
THER1_MD     -AGGTAGCTAGGTGGCACAGTGGATA-GAGTACTGGGCCTGGAGTCAGGAAGACCTGAG
MON1         -AGAGAAGCAGCGTGGCCTAGTGGATA-GAGCACGGGCTGGGAGTCAGAAGGACCTGGG
          * * ** * ** * * * * * * * * * * * * * * *
MIR          TTGGAATCCGGCTCTGCCACTTACTAGCTGTGTGACCTTGGGCAAGTACTTAACTCT
THER1        TTCAAATCCGGCCTCAGACACTTACTAGCTGTGTGACCTTGGGCAAGTCACTTAACTCT
THER1_MD     TTCAAATCTAGCCTCAGACACTTACTAGCTGTGTGACCTTGGGCAAGTCACTTAACTCT
MON1         TTCTAATCNGGCTCTGCCACTTGTCTGTGTGACCTTGGGCAAGTCACTTAACTCT
          *** ** * * * * * * * * * * * * * * * * * * *
MIR          CTGTGCCTCAGTTTCCTCATCTGTAATAATGGGGATAATAATAGTACCTACCTCATAGGGT
THER1        GTCTGCCTCAGTTTCCTCATCTGTAATAATGGGGATAATAATAGCACCTACCTCCAGGGT
THER1_MD     GTTTGCCTCAGTTTCCTCATCTGTAATAATGGGGATAATAATAGCACCTACCTCCAGGGT
MON1         CTGTGCCTCAGTTACCTCATCTGTAATAATGGGGATTAAAGACTGTGAGCCCATGTGGGAC
          * * * * * * * * * * * * * * * * * * * * *
MIR          TGTGTGAGGATTAATGAGTTAA--TACATGTAA--AGCGCTTAGAACAGTGCCTGGC
THER1        TGTGTGAGGATCAAATGAGATAA--TATTTGTAA--AGCGCTTTCAGAAA--CCTTA-
THER1_MD     TGTGTGAGGATCAAATGAGATAA--TAATTTGTAA--AGTACTTAGCACAGTGCCTGGC
MON1         AGGACTGTGTCCAACCTGATTAGCTTGTATCTACCCAGCGCTTAGAACAGTGCCTGGC
          * * * * * * * * * * * * * * * * * * * * *
MIR          ACATAGTAAGCGCTCAATAAATGT---TGTTTATTA-----
THER1        -----AAGCGCTATATAAATGCTAGCTATTATTATTAT--
THER1_MD     ACATAGTAAGTACTATATAAATGTTAGCTATTATTATTATTA
MON1         ACATAGTAAGTGCCTTAACAAATACCA-TAATTATTA-----
          *** ** * * * * * * * * * * * * * * *
    
```

MIR3/THER2(SINE) : L3(LINE)

```

MIR3         GTCAGGAGACCTGGGTTCTAGTCTAGCTCTGCCACTAACTAGCT--GTGTGACCTTGGG
THER2        GTCAGARGACCTGGGTTCAAATYCCRNTTCTGACACTTNATAGCT--GTGTGACCTTGGG
L3b          AACTGGAATGGGTTGCCAGGGAGATTGTGGAATTTCTTCTCTGGAGAGNCTTTAAA
          * * * * * * * * * * * * * * * * * * * * *
MIR3         CAAGTCATT----CACCTCTCTGGGCCTC----AGTTTTCCTCATCT--GTAATAAT
THER2        CAAGTCATTAACTGACCTCTCTGNGCCTC----AGTTT-CCTCATCT--GTAATAAT
L3b          AATAGAATGNATNCTCATCTGTCTGGGATGNTTTAAAGGTAATCCTGCCAAAGNTNGGN
          * * * * * * * * * * * * * * * * * * * * *
MIR3         GAGNGGGTTGGACTAGATGATCTCTAAGGTCCCTTCCAGCTCTAACATTCTATGATTCTA
THER2        GAAGGGTTGGATTAGATAGCCTCTAAGGTCCCTTTCAGCTCTAGA-KCTATGAT----
L3b          GNANGGATTGGACTAGATGACCTCTGAGGTCCCTTCCAATTCTGAGATTCTATGTTTTA
          * * * * * * * * * * * * * * * * * * * * *
MIR3         TGATTCTAAAAAAA
THER2        -----
L3b          AA-----
    
```

MAR1\_MD(SINE) : RTE-3\_MD(LINE)

MAR1\_MD ACCTGGGCAAGTCACTTAACCCGTGTTGCCTCAGTTTCCTCATCTGTA AAAATGAGCTGG  
RTE-3\_MD AGGAGAAGGGGATGGCAGAGGATGAGATGGATAGATAGTGTCAATGGAAGCAATGAACATG  
\* \* \* \* \* \*\* \* \* \*\*\*\* \* \* \* \*

MAR1\_MD AGAAGGAAATGGCAAACCACTCCAGTATCTTTGCCAAGAAAACCCCAATGGGGTCACAA  
RTE-3\_MD AGCTTGGACAG-----ACTTTAGGAGATAGTGGAGGATAGAAGGCCCTGGTATGCTAT  
\*\* \* \* \* \*\* \* \* \* \* \*\* \* \* \* \* \*\* \* \* \*

MAR1\_MD AGAGTCAGACACAACCTGAAAAATGACTGAACAACAACAA-----  
RTE-3\_MD GGTCCATGGGACAACCTGAAGGAATAAAGACAAGAACAATATATC  
\* \* \*\*\*\*\* \* \* \*\*\*\* \*\*

MAR4\_MD/WALLS13 (SINE) : RTE-2 (LINE)

MAR4\_MD ACTTTTG-----TCTTGCCACTGGACTTTGAT---GACTCTGGAAGAGAGAG-TGAGGCTG  
WALLS13 ACTTTTG-----TCYTGCCACTGGACTTCAAT---GACTCTGGAAGAGAGAG-TGAGGCTG  
RTE-2\_MD ATTTAGAGACATCTCCATCCCAATGTTTCATATGGGCTATTTGTGCTGACCTGTGGTAG  
RTE-2\_ME ATTTGGA---ATATCCACCACCAATATTTCATATGGACTATCTGTGCCAACCTGTGGTAG  
\* \* \* \* \* \* \* \* \* \* \* \* \* \* \* \* \* \* \* \* \*

MAR4\_MD ATGACTTTGTGCAACTCTGCCTCACTTAAATCCAATTTATGTACAA-GTCAAAGACATC  
WALLS13 ATGACTTTGTGCAACTCTGCCTCACTTAAATCCAATTCATGCACAA-GTCAA--GACATC  
RTE-2\_MD AGCCTTCTGAGCTCATATTGGTCTGATCAGCCACAGTTAGACACACTGTACATTGACCT  
RTE-2\_ME AGCATTCTGAGCTCATATTGGTCTGATCAGCCACAGTCGGACACACTGAAATTTCACTTT  
\* \* \* \* \* \* \* \* \* \* \* \* \* \* \* \* \* \* \* \* \*

MAR4\_MD ACCA--GTGATGTCATTTTGGTCTCTTTGAGTACAAAGGACAACAACCAACCAACCA--  
WALLS13 ACCT--GTGATGTCATT---GGTCTCTTCAAAAATGAAGGACAACAACAAT-----  
RTE-2\_MD AACATAGTATGTCATTTTGGTCTCTTTGAGTATGAAGGACAAC-----  
RTE-2\_ME ATCATGGTATGTCATTTTGGTCTCTTTGAGATGAAGGACAACAACCAACCTATTAT  
\* \* \*\*\*\*\* \*\* \* \* \*\*\*\*\*

RTESINE1 : RTE-1\_MD (LINE)

RTESINE1 ACTTTTCGTGC-CACTGGACCCAGGCTTCCAACGCCGAGAGAGTGG-GACTGTCTCTGTG  
RTE-1\_MD GCTGCCGTGAACGCCGACACCAGGCCACAACCGCACCTCCCGTAACAACCTGGCGTCCCA  
\* \* \* \* \* \* \* \* \* \* \* \* \* \* \* \* \* \* \* \* \*

RTESINE1 CATCGACTTTCCACTTAA-ATCTCCTTCACGCACAAGTGTCTTTGTGCACTCATCTA  
RTE-1\_MD TGCCCATGTGCCAACAACCTGTGCGCCTCAGCCTTTGGACTCCAAGCCACATGAGGGTA  
\* \* \* \* \* \* \* \* \* \* \* \* \* \* \* \* \* \* \* \* \*

RTESINE1 CATCATAGATGAAAACGCACAAGACAATCGTCACTCCTCGGTTACCGAGAGACTACTACT  
RTE-1\_MD CACCGTAGATGAAACTGCACAAGACAATAGTCATTCTCGATCACCGAGAGACTACCACT  
\* \* \* \* \* \* \* \* \* \* \* \* \* \* \* \* \* \* \* \* \*

RTESINE1 ACTAC  
RTE-1\_MD ----

SINE2-1\_EC : RTE-1\_EC (LINE)

SINE2-1\_EC CACCCACTTCAAAAAAATTTGGCCATGAAAACCCATGAATAGCAGTGGAGCATTGTCTG  
RTE-1\_EC AGCAGGAAAAGAGGAAGACCAATATGAGA---TGGATTGACTCCATAAAGGAAGCCATAG  
\* \* \* \* \* \* \* \* \* \* \* \* \* \* \* \* \* \* \* \* \*

SINE2-1\_EC ATACAGCGCCAGAAGGTGAGAGGATGGCGCAAAAAGACCGGGCAGGGTTCCGCTCTGCTG  
RTE-1\_EC GCATGAGTCTACAGGAGCTGAGTAGGGCTGTTGAGGACAGGACATTGTGGACATCACTCA  
\* \* \* \* \* \* \* \* \* \* \* \* \* \* \* \* \* \* \* \* \*

SINE2-1\_EC TACACAGG-GTCGCTAGGAGTCAGAATCGACTCGATGGCAC-TAACAACAAA-  
RTE-1\_EC TTATAGGAGTACCAGGAGTYGGAGCCGACTTGATGGCATGTAACAACAACA  
\* \* \* \* \* \* \* \* \* \* \* \* \* \* \* \* \* \* \* \* \*

AFRO\_LA/PSINE1 : RTE1 (LINE)

AFRO\_LA -----TGGAAACCCGTGGTCATAGTGG-TTAAGAGCTACGGCTG  
PSINE1 -----GGAAACCCGTGGTGTAGTGGTTAAGTGTACCCTG  
RTE1\_LA CAGGGTCAGCGGAAAAGAGGAGACCCT--CAATGAGGTGATTGA-CACAGTGGCTG  
RTE1\_Pca GAGGGTCAGCGAAAAGAGGAGACCCT--CGACGAGACGGATCGA-CACAGTGGCCG  
\* \* \* \* \* \* \* \* \* \* \* \* \* \* \* \* \* \* \* \* \*

AFRO\_LA CTAACCAAAGGTTGGCAGTTCAAATCCACCAGGTGCTCCTTGAAACTCTATGGGGCAG  
PSINE1 CTAACCACAAGGTCGGCAGTTCAAATCCACCAGGCGCTCCTTGAATACTCTGGGGTCAG  
RTE1\_LA C-AACAATGAGCTCAAGCATAACAA-CGATTGTAAGGATGGCTCAGGACCGGGCAGTGT  
RTE1\_Pca C-AACAATGGGCTTAAGCATAAAA-CGATTGTGGACATGGCGCAAGACCGGGCAGTGT  
\* \* \* \* \*

AFRO\_LA TTCTACTCTGTCCATAGGGTCGCTATGAGTCGGAATCAACTCGACGGCAATGGGTTTGG  
PSINE1 TTCTACCCCTGGCCCTAGGGTCGCCATGAGTCGGATCCGACTCGACGGCACTTGGCTTGG  
RTE1\_LA TCGTTCTGTTGTCATAGGGTCGCTATGAGTCGGAACCACTCAATGGCACCTAACACA  
RTE1\_Pca TCGTTCTGTTGTTTCATAGGGTCGCTATGAGTCGGAACCGACTCGACGGCACCTAACACA  
\* \* \* \* \*

AFRO\_LA TTTTGGTTTTTTT  
PSINE1 CTTGGC-----  
RTE1\_LA ACAACAA-----  
RTE1\_Pca ACAA-----

RTE1-N1\_LA(SINE) : RTE1\_LA(LINE)

RTE1-N1\_LA TTCGAAAATAGCCAAAGAAAACC---CTATGGATCACAACAGAATATT--GTCCAATA  
RTE1\_LA TTTGGACATGTTGTCAGGAGGATCAGTCCTGGAGAAGGACATCATGCTTGGCAGAGTA  
\*\* \* \* \* \* \*

RTE1-N1\_LA TAGTGTGGAAGATGAGCCCCCTAGGTTGGAAGGCACTCAAAATACACAGTGGCTGCAAC  
RTE1\_LA CAGGGTCAGCGGAAAGAGGAGACCCCTC-AATGAGTGGATTGACACAGTGGCTGCAAC  
\*\* \* \* \* \* \*

RTE1-N1\_LA AATGGACTCAAGCATACCAACGATCATGAAGATGGCAGGACCAGGCAACGTTTGTTC  
RTE1\_LA AATGAGCTCAAGCATAACAACGATTGTAAGGATGGCTCAGGACCAGGCAAGTGGTTTCGTTTC  
\*\*\*\* \* \* \* \* \*

RTE1-N1\_LA TGTGTACATGGGTCGCCATGAGTCGGAGCCGACTCGATGGCACTAACAAACAACAA  
RTE1\_LA TGTGTGCATAGGGTCGCTATGAGTCGGAACCACTCAATGGCACCTAACAAACAACAA  
\*\*\*\*\* \*\* \* \* \* \* \*

SINE2-1\_Pca : RTE1\_Pca(LINE)

SINE2-1\_Pca AAAGGCTGGCGATCTACTTCTGAAAATCAGCCAATGAAAACCCGTGGATCAGAGTGGT  
RTE1\_Pca AGCGAAAAGAGGAGACCCCTCGACGA--GACGGATCGACACAGTGGCCGAACAATGGG  
\* \* \* \* \*

SINE2-1\_Pca CTGA--TCTGCAACTGATCATGGGATGGCGCAGGACCGGGCAGCGTTTTGTCTATTGT  
RTE1\_Pca CTTAAGCATAAAACGATTTGGACATGGCGCAAGACCGGGCAGTGTTCGTTCTGTTGT  
\*\* \* \* \* \* \*

SINE2-1\_Pca GCATGGGTCGCCATGAGTCGGG--CCGACTCGATGGCAGCTAACACAA---  
RTE1\_Pca TCATAGGGTCGCTATGAGTCGGAACCGACTCGACGGCACCTAACAAACAACAA  
\*\* \* \* \* \* \*

TguSINE1 : CR1-X(LINE)

TguSINE1 -----AGATTAGCTCAGTTGGTCAGAGCATG  
CR1-X1\_Pass GGCTCCCCAGGGAAGTGGTCACAGCACCAAGCCTGACAGAGTTCAAGAAGCGTTTGGACA  
CR1-X2\_Pass GGCTCCCCAGGGAAGTGGTCACGGCACCAAGCCTGTCAGAGTTCAAGGAGCGTCTGGACG  
CR1-X3\_Pass -----GTGTTTAAAGGCAATTTGGACA  
CR1-X1\_3end GGCTCCCCAGGGCAGTGGGCACGGCCCGAGC-TGCCGGAGTTCAAGGAGCGTTTGGACA  
CR1-X2\_3end GGCTCCCCAGGGCAGTGGTCACGGCCCGAGC-TGCCGGAGTTCAAGAAGCATTGGACA  
\* \* \* \* \*

TguSINE1 GTGCTAATAACACCAAGGTTATGGGTTTGGATCCCATATGGGCATTCACTTAAAGAGTTG  
CR1-X1\_Pass ATGCTCTCAGGCACATGTTGTGACTCTTGGGGATGGTCCTG--TGACGGGCCAGGAGTTG  
CR1-X2\_Pass ATGCTCTTAGTCATATGGTTT-AGTTTTAGG--TAGTCCTG--CGAGGAGCAGGAGTTG  
CR1-X3\_Pass ATGCCCTAATAACATGCTTTAACTTTTGGT--CAGCCCTG--AAGTGGTCAGGCAAGTTG  
CR1-X1\_3end GCCTCTCAGACATAGGGTTTGAATTTTGGG--TGCTCCTG--TGTGGAGCCAGGAGTTG  
CR1-X2\_3end ACCTCTCAGACATAGGGTTTGAATTTTGGG--TGCTCCTG--TGTGGAGCCAGGAGTTG  
\*\* \* \* \* \* \*

TguSINE1 GACTCAATGATCCTTGTTGGGTCCCTTCCAACCTCAGAATATTCTGTG--ATTCT-----  
CR1-X1\_Pass GACTCGATGATCCTTGTTGGGTCCCTTCCAACCTCAGCATTATTCTGTG--ATTCTGTG--AT  
CR1-X2\_Pass GACTCGATGATCCTTATGGGTCCCTTCCAACCTTGAGATATTCTATG--ATTCTATG--AT  
CR1-X3\_Pass GACTAGATGATCGTTGTAGGTCCCTTCCAACCT--GAAATATTCTATTCTATTCTAT  
CR1-X1\_3end GACTCGGTGATCCTTGTTGGGTCCCTTCCAACCTGGGATATTCTATG--ATTCTATG--AT

CR1-X2\_3end GACTCGATGATCCTTGTGGGTCCCTTCCAACCTCGGGATATTCTATG--ATTCTATG--AT  
\*\*\*\* \* \* \* \* \* \* \* \* \* \* \* \* \* \* \* \* \* \* \* \* \* \* \* \* \* \* \* \* \* \* \* \* \* \*

TguSINE1 -----  
CR1-X1\_Pass TCTATG-----  
CR1-X2\_Pass TCTATG-----  
CR1-X3\_Pass TCTATTCTATTCTATTCTATTCTATTCTATTCTATTCTATTCT  
CR1-X1\_3end TCTATG-----  
CR1-X2\_3end TCTATG-----

SINE2-1B\_ACar/SINE2-1\_ACar : Vingi-2\_Acar (LINE)

SINE2-1\_ACar CTCTATCAGCTCCAGCTCCATGCGGGGACATGAGAGAAGCCTCCCACAAGGATGGT  
SINE2-1B\_ACar CTCTATCAGCTCCAGCTCCATGCGGGGACATGAGAGAAGCCTCCCACAAGGATGGT  
Vingi-2\_Acar TTCTAACAG--CAACACCA--GAGGCACTCCAAGTGCCAGCTACTGGGCAAAA  
\*\*\*\* \* \* \* \* \* \* \* \* \* \* \* \* \* \* \* \* \* \* \* \* \* \* \* \* \* \* \* \*

SINE2-1\_ACar AAAA-CATCAAACATCCGGGGCGTCCCCTGGGCAACGTCCTTGCAGACGGCCA--ATTCT  
SINE2-1B\_ACar AAAAACATCAAACATCCGGGGCGTCCCCTGGGCAACGTCCTTGCAGACGGCCA--ATTCT  
Vingi-2\_Acar GACA--TTTAGTATTAATGCCAAGTTTTGTTTTTTTCTTAAAAAAAATCTCTATGTT  
\* \* \* \* \* \* \* \* \* \* \* \* \* \* \* \* \* \* \* \* \* \* \* \* \* \* \* \*

SINE2-1\_ACar CTCACCTCAGAAAGCAACT-----CCGGTTGCTCCTGACACGAAAAAAAAAAAA  
SINE2-1B\_ACar CTCACACGAGAAGCGACTTGCAGTTTCTCAAGTCGCTCCTGACACGAAAAAAAAAAAA--  
Vingi-2\_Acar TGCAATCCATTACAACCTGTACCCTC--GGTTTCGCTTCTGACACGAGAAATAAATAA--  
\* \* \* \* \* \* \* \* \* \* \* \* \* \* \* \* \* \* \* \* \* \* \* \* \* \* \* \*

SINE2-1\_XT : L2-4\_XT (L2-3, L2-6, L2-2) (LINE)

SINE2-1\_XT CTTAGATTGTAAGCTCCTCTGGGGCAGGGACTGATGTGAATGATGAATAATCTCTGTA  
L2-4\_XT AATTGTTTATATGTACATGTTAACT--GTTCTGCTTTTGTACCCCTCTATTCTGTAAA  
L2-3\_XT CTTTATATGT-TA--CTCTGTATGT--CCAATGTATGTAACCCA--CTTATTGTACA  
L2-6\_XT CCTTGTTTGT-TAAACTTTTTAAGA--TCCTGTTTGT-TAAA--TTTATTGTGAA  
L2-2\_XT ATTTATCTAT-TA--TCTTATTAAC--CCCCTGTTGTATTAATGTATTCTACTGTACA  
\* \* \* \* \* \* \* \* \* \* \* \* \* \* \* \* \* \* \* \* \* \* \* \* \* \* \* \*

SINE2-1\_XT GCGCTGCGGAAATGTTGGYGCTATATAAATAACAGGAAATAAATAAATAAAT--  
L2-4\_XT GCGCTGCGTAAAT-TGATGGCGCTATATAAATAA-TAATAATAATAATAA-----  
L2-3\_XT GCGCTGCGGAATA-TGTTGGCGCTTTATAAATAAATGTTAATGTAATGTAATGTAAT  
L2-6\_XT GCGCTGCGTAAT-TGCTGGCGCTATATAAATAAATGATGATGA-----  
L2-2\_XT GCGCTGCGTACAT-AAGTAGCGCTTTATAAATAAAGATATACATACATACATA--  
\*\*\*\*\* \* \* \* \* \* \* \* \* \* \* \* \* \* \* \* \* \* \* \* \* \* \* \* \* \* \* \*

MIR\_Xt (SINE) : L2-5\_XT (LINE)

MIR\_Xt AC-CCTGGTTCGATTCCTGTGGCAACTCCTTGTGACCCTGGACAAGTCACTTAATCTCC  
L2-5\_XT ACGTTTAAATCAAACCTGAAAAGCCACCTGTT-TAGCCTGGCATTTATGTCACATAACT  
\*\* \* \* \* \* \* \* \* \* \* \* \* \* \* \* \* \* \* \* \* \* \* \* \* \* \* \* \* \*

MIR\_Xt TGGTGTCCAGCATACTTAGTGCGCCTATAATGGCTGCCTTGCTTGCTGTAAGCGCTTT  
L2-5\_XT T--TTCCTCTGCACACATAG--ATATGACTG--ATCTGAGACAAGCTTATGCGCTTT  
\* \* \* \* \* \* \* \* \* \* \* \* \* \* \* \* \* \* \* \* \* \* \* \* \* \* \* \*

MIR\_Xt GAGTCCCACGGGAGAAAAGCGCTATATAAATGATWCC- TTACCCTTA--  
L2-5\_XT GGGTCCCACGGGAGAAAAGCGCTTACAAAATGTTGTTGTTGTTGTTGTTG  
\* \* \* \* \* \* \* \* \* \* \* \* \* \* \* \* \* \* \* \* \* \* \* \* \* \* \* \*

SINE3 : CR1\_DR (LINE)

SINE3-1 CTGGCGCGTGTCTGCTGTGGCTGCCGTCGCATCATCCAAGTGATGCTGCACACTGGTGG  
SINE3-1a CTGGCGCAAA-----ATGGCTGCCGTCGCCTCATCCAGTGATGCTGCACACTGGTGG  
CR1-4\_DR ATATTGCTATTGCGTTTTAACCTGTTTGGTCAATGATGTTTTAGTAAATGTTAAATTT  
CR1-7\_DR ATTGCTTTTAAAT--GATTTTATGGATTAACACTATGATTTATTAATCTCTGTCTTGT  
CR1-9\_DR ATGCTCTTAGG--TTTCGTTTGTGTTATTCATGTTGTTATTTGACCTCATGTAT  
CR1-13\_DR ATGGTTCATA-----TTTTTATTGTTTTATT--GCATCCTTTATGTTGTGCTGTTTT--  
\* \* \* \* \* \* \* \* \* \* \* \* \* \* \* \* \* \* \* \* \* \* \* \* \* \* \* \*

SINE3-1 TGGTGTGGAGAGACCCCCCTCATGATTGTGAAGCG-CITTTGGGTGATGGCCATACACA  
SINE3-1a TGG-ATGAGGAGATTCCCCCAATG--TGTAAGCG-CITTTGAGTGCCAG-----  
CR1-4\_DR GTTTTAGCATGTCTGT-TGATGCTTATTGTAAGCGACCTTGGGTGCTTG-----

CR1-7\_DR TTTTATAATGTGCTGTGACAT--ACTGTAARGTGCCTTGAGTGCTCTG-----  
CR1-9\_DR GTTTGTATCTTTTTTGTGCTGCTTGTAAAGTGCCTTGAGC-TCTGG-----  
CR1-13\_DR GCTTGCTGTGTTCTAGTATTTTGCCTGTA--GCG-CTTTGAGT-ATAAG-----  
\*\*\* \* \* \* \* \* \*

SINE3-1 ATAAATGCGC--TATATAAATACACATTAC-ATTAC-ATTA-----  
SINE3-1a --AAAAGCGC--TATATAAATGAAGGAATTATTATTATTATTATT-----  
CR1-4\_DR --AAAGGCGCATTACAAATAAAATGAATTATTATTATTATTATTATTATTA  
CR1-7\_DR --AAAGGCGC--TATAAATAAAGGGTATTATTATTATA-----  
CR1-9\_DR --AAAGGCGC--TATATAAATAAAATATTATTATTATTATTAT-----  
CR1-13\_DR --AAAAGCGC--ATTACAAATAAAATGTATTATTATTATTATTATTATTA-----  
\*\*\* \*\*\*\* \* \* \*\*\*\* \* \* \*\*\*\* \*\*\*\*

SINEX-1\_CM/SINE2-1\_CM : CR1-2\_CM (LINE)

SINEX-1\_CM ATAAATCCCTCCAAAACCAAAAACAATAAATAAATTGGTCATTTTCAATCYAHGACTGTTG  
SINE2-1\_CM ATAAATCCCTCCAAAACCAAAAACAATAAATAAATTGGTCATTTTCAATCYAHGACTGTTG  
CR1-2\_CM ATTTCCCGCT---CCTCGCTCCCTCC---TTCCCTCCCCTCA--CCCTGACCATTTC  
\*\* \*\* \* \* \* \* \* \*\* \* \* \* \* \*

SINEX-1\_CM TGGGACATTGCTGTGCGCAATTGGCTGCCGCTTCCGCCACAAATACAGTCAATTCAC  
SINE2-1\_CM TGGGACATTGCTGTGCGCAATTGGCTGCCGCTTCCGCCACAAATACAGTCAATTCAC  
CR1-2\_CM CC--CCTCCTCGCTCCCTCCCTCCCTCCCTCACCCTGACCATTCCCGCTGCTCGG  
\* \* \* \* \* \* \* \* \* \* \* \* \* \* \* \* \*

SINEX-1\_CM TTTACAGTRTRTTCTGTGAAGCGCTTTGGGACGTCCTCCCGACGTGAAAAGCGCTATATC  
SINE2-1\_CM TTTACAGTRTRTTCTGTGAAGCGCTTTGGGACGTCCTCCCGACGTGAAAAGCGCTATATC  
CR1-2\_CM GTCATGACCCAA-CTGTGACGCGCTTGGGACGTCCTCCTGACGTGAAAAGCGCTYAT-  
\* \* \*\*\*\*\* \*\*\*\*\* \*\*\*\*\* \*\*\*\*\* \*\*\*\*\* \*\*

SINEX-1\_CM AAATGCAAGG--ATTATTATTATT--  
SINE2-1\_CM AAATGCAAGG--ATTATTATTATT--  
CR1-2\_CM AAATGGAATCTTGTGTTGTTGTTGT  
\*\*\*\*\* \*\* \*\* \* \* \* \*

BfISINE1 : Crack-16\_BF (LINE)

BfISINE1 ACC-CCAGGCACGTTAAAGAACCCACCACACGTGCGATGGTGCGGTGTGAGATGGTGCAA  
Crack-16\_BF ACTGTTTTTCAGTTTACCATATGTTTCTTTCTGTTATTTCAAAGTATAATTTGTATAA  
\*\* \*\* \* \* \* \* \* \*\* \* \* \* \* \*

BfISINE1 ATCCTTC-CGTCTAGAATTGGTGATTCTCTACAAATC--ACCCGACTCCAGGAAGAATA  
Crack-16\_BF TTTGTACATTTCTGTTGCAATTATTTCTGTATTGTTTAAATGTGGACTCCAGGAAGACTA  
\* \* \* \* \* \* \* \* \* \* \* \* \* \* \* \* \*

BfISINE1 GTGACATATCAGTCACTAATGGAGATCTGTATAA-CCAAACCAACCAACCTAA  
Crack-16\_BF GTG--TATT--TCACTAATGGAGATCTAAATAAACCAACCAACCAACCAAA  
\*\*\* \*\* \*\*\*\*\* \*\*\*\*\* \*\*\*\*\* \*\*\*\*\* \*\*\*\*\* \*\*

SINE2-4c\_SP : CR1-4\_SP (LINE)

SINE2-4c\_SP TCCACCCAGGTGTAGTAAA--TGGGT-ACCTGGTAGGAATTTATCCTTGAATGC  
CR1-4\_SP TGTACCATGGCACCATGAAGTTGTGTATCTAATGCAAGTTAA--CATTTAATAT  
\* \*\* \* \* \* \* \* \* \* \* \* \* \* \* \* \* \* \*

SINE2-4c\_SP TTTTAGCGCTTAGGGCAGCTGGGCTAAAGCCAGGGTAATAACTACTTTGTAGGCGCC  
CR1-4\_SP TTCTTTAATCTTAAGTATGTTG---AATATTAATTTAA---ATTA-TTTGTATGCGCC  
\*\* \* \*\*\*\* \* \* \* \* \* \* \* \* \* \* \* \* \* \* \* \*

SINE2-4c\_SP TTGAGCATCCCCTGGGATGGATACGT-GCGCAATATAAATGTAGCTATTATTATTATTA-  
CR1-4\_SP TTGAGCATCTCTAGAGATGGATATGTTGCGCTTATAAATATTGTTATTATTATTATTA  
\*\*\*\*\* \* \* \*\*\*\*\* \*\* \*\*\*\*\* \*\*\*\*\* \* \* \*\*\*\*\*

SINE2-3\_SP : CR1Y\_SP (CR1X\_SP) (LINE)

SINE2-3\_SP GAGAAGAGTCACTACCTT-TGCAGGTTAAGAACCACCTGCACTATTCGTATAAGAGTAGG  
CR1Y\_SP GCCTTCGGTCAAYRMCTGACGGGAGGCAGCAACTAAGTCCGGGAACTTTTACTGGCACT  
CR1X\_SP GCCTTCGGTCAATGCCTGACGGGAGACAGCAACTAAGTCCAGGAAATTTTTACTTGCACC  
\* \*\*\*\* \* \* \* \* \* \* \* \* \* \* \* \* \* \* \*

SINE2-3\_SP G-GGAAACCCCGGTGTAGTGGTCCACCTGCACACCCCAACCAGGCCGAGTATAATACGGC  
CR1Y\_SP ATGTAATAGCATTGCACCATGCACCTTGCTC-TCGTA---AGCACACACACACTCATCA  
CR1X\_SP ATGTAATAGCATTGCACCATGCACCTTGCTC-TCGTAATTAAGCACACACACACTCATCA  
\* \*\* \* \* \*\* \* \* \* \* \* \* \* \* \* \* \* \* \* \*

SINE2-3\_SP ATCTGCAAGGATCTTCACTATTGAAGGAGGAGA-TTATCTGAAGAAGAAGAAGAA---  
CR1Y\_SP GTCTGCAAGAATCTTCACTATTGAAGGAGGAGA-TTATCTGAAGAAGAAGAAGAA---  
CR1X\_SP GTCTGCAAGAATCTTCACTATTGAAGGAGGAGA-TTATCTGAAGAAGAAGAAGAA---  
\*\*\*\*\* \*\* \* \* \* \* \* \* \* \* \* \* \* \* \* \*

SINE2-8\_SP(SINE2-6, SINE2-4b) : L2-1\_SP/CR1-3\_SP(LINE)

L2-1\_SP AATTTTTTACA-GTGTATGCACTTGGAGAGCAAATAATTA---TTCTGTTTTATTACT  
SINE2-8\_SP TGCACACAGTGTGTGCGGGCAAGCACTGAATCCAATGACCGGGTAATAGTATATT--T-  
SINE2-6\_SP TCTGTAAGCGCTTTGAGAGGGCCTCCGGTCTGAAA--AGCGCTATAAAGAAGGAGCT--TA  
SINE2-4b\_SP GGTACCTGATATGCTTGAGCGC-TAGTACTTTGGCAGCTCGGCTACGACCAGGGTAATA  
\* \* \* \* \* \* \* \* \* \* \* \* \* \*

L2-1\_SP AATGTAAGCGCTTTGAGC-----ATGTTTATGAAA-GGCGTATATAAATATCAA-T  
SINE2-8\_SP --TGTAAGCGCTTTAGAGA-----CATTTGTATTA--AGCGCTATAAAGGTAAT  
SINE2-6\_SP TCTGTAAGCGCTTTGAGAGGGCCTCCGGTCTGAAA--AGCGCTATAAAGAAGGAGCT  
SINE2-4b\_SP TGTGTAAGCGCATGAGCGTCAGAACCTGGCGGATACCGCGCTATATAAATAACCA-T  
\*\*\*\*\* \*\* \* \* \* \* \* \* \* \* \* \* \* \* \* \*

L2-1\_SP ATGTATGTATGTATG-----  
SINE2-8\_SP ATTATTATTATTATTATTA---  
SINE2-6\_SP ATTATTATTATTATTATTATT  
SINE2-4b\_SP ATTATTATTATTATTATTATT  
\*\* \* \* \*\*

Gecko (SINE) : I\_Ae(LINE)

Gecko AAAAAGTTATAGTGACGACTTCCTTCGGAAGGGAA---GTAAAGCCGTTGGTC---CCG  
I-74\_Ae G---TAACAGACTAGAGAATACCTTAAGGTACCTC-TAGCGTCAATATTCGTCAACCG  
I\_E1e35 C---TATAAAGCTCTGTAATTCCTGGAGTCCCTTATGGTACCCACCTTTTTCC-TCG  
I\_E1e37 CACATTATTCGGGAGGTTGAATCCTTCAGGTTCTCCTCCTTTTTTATATTTTTG---TCG  
I-62\_Ae AGCAAAATGTACAGGGGGCCTCTCACTACGAAGCCCTCT---CCATATTCTCTACCGG  
I-59\_Ae ATTACTCTGTATAAGTATTACTGCCAGGAGGGGCAATGTAACGCCCTTTTTTTCACGG  
I\_E1e14 TCAGTCTTCTGCTGACCGTATTTCTCCAGGGTCTCAGCCTTCTGCTGAGCCTTCTC-CGG  
I-58\_Ae TCAGTCTTCTGCTGACCGTATTTCTCCGGGTCTCAGCCTTCTGCTGAACTTCTC-CGG  
I\_E1e10 TTGAAAGCCTGTAAAAGCTCTTATTGAAAGCAGCCTTCTGGGCTTTCTGACAAATGG  
I-64\_Ae TATGGTTCCGCTTACTTTCCCGGTTACACGAGTGCCCTTCAGGCACCTCATGTGG-CAG  
\*

Gecko AGATGAAGTACTAGCCAGGGC--TAAAAATCTCGTTAATAAAGATAGAAAAA-----  
I-74\_Ae AGATGAAGTACTAGCCAGGGC--TAAAAATCTCGTTAATAAAGATAGAAAAA-----  
I\_E1e35 AGACGAACCAAGCCAGGGC--TAAAAATCTCGTTAATAAAGATAGAAAAA-----  
I\_E1e37 AGGTGAACCAAGCCAGGGC--TAAAAATCTCGTTAATAAAGATAGAAAAA-----  
I-62\_Ae AGACGAACCAAGCCAGGGC--TAAAAATCTCGTTAATAAAGATAGAAAAA-----  
I-59\_Ae AGACGAACCAAGCCAGGGC--TAAAAATCTCGTTAATAAAGATAGAAAAA-----  
I\_E1e14 TGTTGAAGTACTAGCCAGGGC--TAAAAATCTCGTTAATAAAGATAGAAAAA-----  
I-58\_Ae TGTTGAAGTACTAGCCAGGGC--TAAAAATCTCGTTAATAAAGATAGAAAAA-----  
I\_E1e10 TGATGAAGTACTAGCCAGGGC--TAAAAATCTCGTTAATAAAGATAGAAAAA-----  
I-64\_Ae TGATGAAGTACTAGCCAGGGC--TAAAAATCTCGTTAATAAAGATAGAAAAA-----  
\* \*\* \* \* \* \* \* \* \* \* \* \* \* \* \* \*

SINE2-1\_NV : CR1-16\_NV(LINE)

SINE2-1\_NV TTGACTTGTGAACGTATGTGAGCTTACTAGAAGCTTGTGTTCCAGTTCGAAGATGGG  
CR1-16\_NV GTAACATTTCCCTATTAGACACAATGATTTGTCAG--GGTGATTTTTAATTTTTAATTTG  
\* \* \* \* \* \* \* \* \* \* \* \* \* \* \* \* \* \* \* \*

SINE2-1\_NV ACATTCTTAATACATTAGGATTTTAAATGTGAAGCGCTTAGAACA-TGGTTGGTATAAGC  
CR1-16\_NV TAATGTTTATTTAATGATATAT-AATTGTAAGTGCCTAGGGCAATTATTGATG-AGGC  
\* \* \* \* \* \* \* \* \* \* \* \* \* \* \* \* \* \* \* \*

SINE2-1\_NV GCTATATAAATGCT-ATATTATTATTAT-----  
CR1-16\_NV GCTATATAAATGCTATATTATTATTATTATTATTATTATTATTATTATTATTATTATTATTA  
\*\*\*\*\* \*\* \* \* \* \* \* \* \* \* \* \* \* \* \* \*

SINE2-5\_NV : Rex1-24\_NV(LINE)



EdSINE1 ATCAAAAATG-----AGAAAAGAAAATTCTCACAGTTCAACAACAAAAAGCAAAGAATAA  
R4-1\_ED ATAAAAACCTTGTAAATTA AAAACATGATGGACGTATGGAGCACTGTGGAGATCACAA  
\*\* \*\*\*\*\* \* \*\* \*\* \*\* \* \*\* \* \*\* \* \*\* \* \*\*

EdSINE1 GCTAATAGTTGAAGAACAATACAT--TAAAGCGAAGGGATGGATTAGTCTCCCCTGA  
R4-1\_ED CCAAACATATGATGTTGAAC TACAAGACGAAGACGAAGGACGGGATTAGTCTCCCCTGA  
\* \*\* \* \*\* \*\* \*\* \* \* \* \* \*\* \* \*\* \* \*\* \* \*\* \* \*\* \* \*\* \* \*\*

EdSINE1 GCAAGGAACAATAGAAAATATTTCTATTAATACTTAATTAAC TACTTTTATTT  
R4-1\_ED GCCAGGAACAATAGACACAAGTTCTATTAATACTTAATTAAC TCTTTTT----  
\*\* \*\*\*\*\* \* \* \*\*\*\*\* \*\*\*\*\*

R4-N1\_ED (SINE) : R4-1\_ED (LINE)

R4-N1\_ED GGAAGAAATGAAACAAAGAAATGCCTTCCTCATATTCCAAGAAAACCTAAAATATATGT  
R4-1\_ED ATAAAAACCTTGTAAATTA AAAACATGATGGACGTATGGAGCACTGTGGAGATCACAA  
\* \*\* \* \*\* \*\* \*\* \* \* \* \* \* \* \* \* \* \* \* \*\*

R4-N1\_ED TAAACAAAAGA-TTACTCTTTTTTAAACAG-CTCAGTGATGGAATTAGTCTCCCCTAAA  
R4-1\_ED CAAACATATGATGTTGAAC TACAAGACGAAGACGAAGGACGGGATTAGTCTCCCCTGAG  
\*\*\*\*\* \* \* \*\* \*\* \* \* \* \* \* \* \* \* \*\*\*\*\* \*

R4-N1\_ED CTAGGAAGAATAGATGAAAAATCTATTAACACTTAATTAATAATTTTAT  
R4-1\_ED CCAGGAACAATAGACACAAGTTCTATTAATACTTAATTAAC TCTTTTT--  
\* \*\*\*\*\* \*\*\*\*\* \* \*\*\*\*\* \*\*\*\*\* \* \*\*\*\*\*

SINEX-1\_CR : RandI-2 (LINE)

SINEX-1\_CR TGGACTTTGAGGAGCGGCCTAGGACTTGGAGTTGTAGTTTCGGAGGTTGTGACTCT--  
RandI-2 CCGAGCAGGAACTCAAACCGAGAGGTGGGTGAGCCACGGCTCCCCACACCTCCTCGGAG  
\* \*\* \*\* \* \*\* \* \*\* \* \* \*\* \* \*\*

SINEX-1\_CR TTCGTGGTGAGGCGTCAGCGTGAGGGGGCGGGCCCTCTGCCCTAGTCACCTTGCCCG  
RandI-2 TGCGTGGTGAGGTTGCCAGCGGAGGGGGATGGGCTCCTGCCCTAGCCACCTTACCCCG  
\* \*\*\*\*\* \* \*\*\*\*\* \*\*\*\*\* \*\*\*\*\* \*\*\*\*\* \*\*\*\*\* \*\*\*\*\*

SINEX-1\_CR TTAATCCATGCCAGGCCCTATGGGCGGCGTTGAATTATTATTATTATT  
RandI-2 ATAATCCACGCCAGGCCCATGGGCGGCGTTGAATTATTATTATTATT  
\*\*\*\*\* \*\*\*\*\* \*\*\*\*\* \*\*\*\*\* \*\*\*\*\*

SINEX-4\_CR : RandI-2 (RandI-3) (LINE)

SINEX-4\_CR CCCGCTCCCACCGGTTGGGACGACCGGCAAATGATAAGGTGCGTGGTGACTTCCCGCC  
RandI-2 GAGGTGGGTGAGCCACGGCTCCCCACACCTCCTCGGAGTG--CGTGGTGAGGTGGCAGC  
RandI-3 CCCGAGGTG-----TGTC CCAACCGCCGCCCT---TG--CGTGGTGAGGCGGCAGG  
\* \* \* \* \* \*\* \*\*\*\*\* \*

SINEX-4\_CR TTCTCTGAACTGGGTTGAGAGATGATCAGCGAAGGGGTTGCCCGTTAAATACATGCTAG  
RandI-2 GCGAGGGGGATGGCCCTCCTGCCCT--AGCCA--CCTTACCCGATAATCCAGCCAG  
RandI-3 GTA--GGGGATGGGCCCTTACACTG--ACCCG--CCTTGCCCGATAATCCAGCCAG  
\* \* \*\* \* \* \*\* \* \*\* \* \*\* \* \*\* \* \*\* \*

SINEX-4\_CR GCCCTATGGGCCAGCGTTGGGATTATTATTATTATTATT  
RandI-2 GCCCATGGGCCGGCCTTTGAATTATTATTATTATT--  
RandI-3 GCCCTACGGGCGGCCTTTGATTATTATTATT-----  
\*\*\*\* \* \*\*\*\*\* \*\*\*\*\* \*\*\*\*\*

SINEX-5\_CR/SINEX-6\_CR : RandI-5 (LINE)

SINEX-5\_CR TGGTAGGCCGATAAGCTCAGATCTT-CGGATCCTATGAGCTGAGTAGAGGGTGATGCGTG  
SINEX-6\_CR TGGTAGGCCGATAGGTCAGAACTT-CGGTTCCTATGAGCTGAGTGAAGGTGGATGCGTG  
RandI-5 AATGGGATTGTGAACTCACGCCAAGTCGGCCCACTGGCGGCCACGGCTGCTGGGCC  
\* \* \* \* \* \*\* \* \* \* \*\* \* \*\*

SINEX-5\_CR GGGTGCTCTAGTCAGGG-----TCCACAG---GGTACGGTAGGGTT---CTAAGAAG  
SINEX-6\_CR GGGTGCTCTTGCCAAGG-----TCCACAGA--GATACGGTAGGGTATGCCTCGATGG  
RandI-5 CAGCCCTCGCGATCCAGGCTAACTTTCCACCTTTTGACACGGTGGGTGAG---CAAAC  
\* \* \* \*\* \* \*\* \* \*\* \* \*\* \* \*\* \* \*\* \*
