# Supplementary material for: Parallel Relaxation of Stringent RNA Recognition in Plant and Mammalian L1 Retrotransposons
Source: PubMed Central journal article supplement — Mol Biol Evol. 2012 Jul 13;29(11):3255–9. doi: 10.1093/molbev/mss147 (PMC3472496; doi:10.1093/molbev/mss147), 2012-07-13
Supplement: supp_mss147_Suppl_Figs.pdf [file supp_mss147_Suppl_Figs.pdf]

Fig. S2

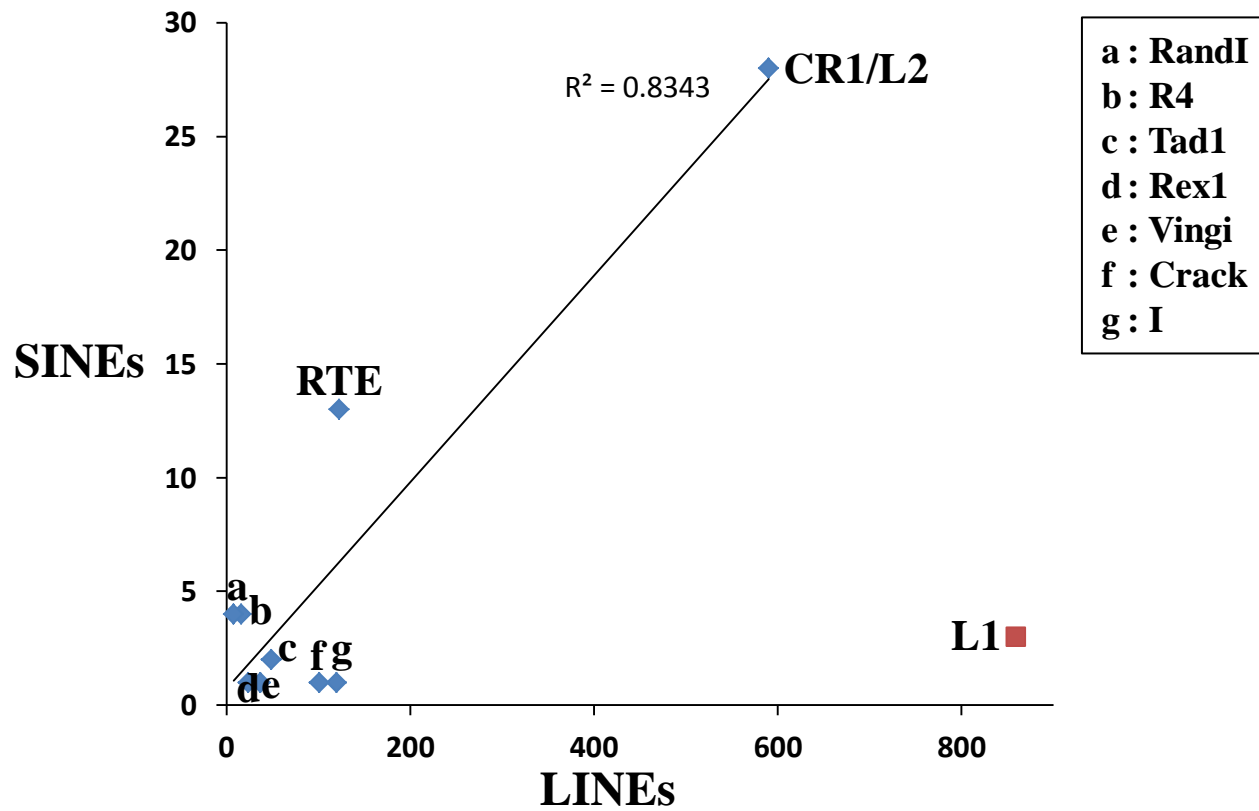

Fig. S3

|           | Box A                                                                                                               | Box B |      |
|-----------|---------------------------------------------------------------------------------------------------------------------|-------|------|
| TS        | <u>GACAAGAGGGGT</u> <b>TGCTCTGATGG</b> TAAGCAACCTCCACTTCCAACCAAGAGGTTGTG <b>AGTTCGAGTC</b> ACCCCAAGAGCAAGGTGGGGAGTT |       | 90   |
| RTE-1_STu | tttcttgat·t·attg·ctcctt·gttg·tta·a····at·ttt·gtatt·gatgta·gttttat·ta·ttttct·tcct·ttacttgg                           |       | 3961 |
| TS        | CTTGAGGGAAGGATGCCGAGGGTCTATTGAAACAGCCTCTCTACC-CCA--GGGTAGGGGTAAGGTCTGCGTACACACTACCCTCCCC                            |       | 177  |
| RTE-1_STu | a·t·t·t·t·cttga·t······tcc··········t··cga····t·c··········t········                                                |       | 4051 |
| TS        | AGACCCAC-TAGTGGGATTATACTGGGT-TG(TTG) <sub>0-14</sub> -3'                                                            |       | 207  |
| RTE-1_STu | ········c········tc······a·ttggttggttg-3'                                                                           |       | 4095 |

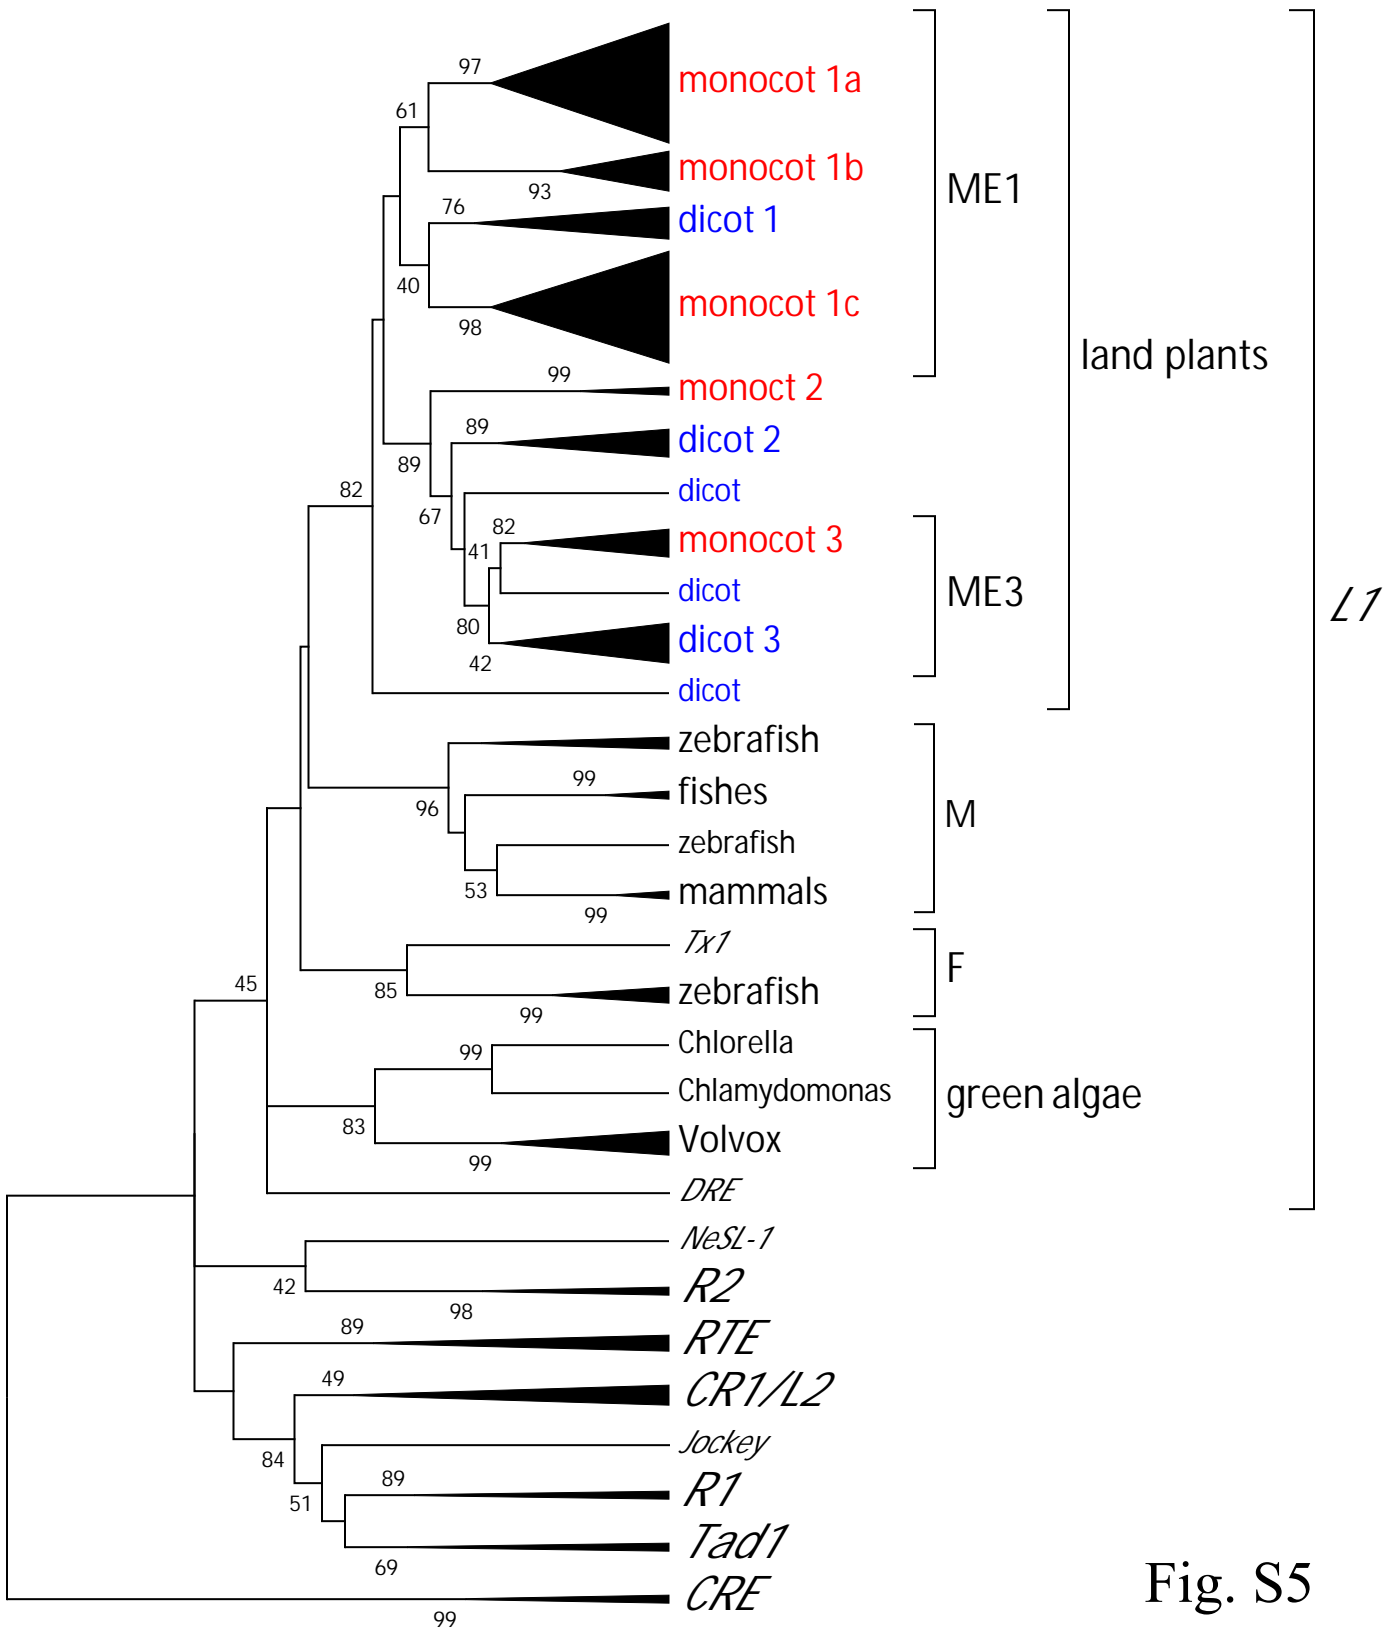

Fig. S5

Fig. S6

|     |                   |                               |                |                |
|-----|-------------------|-------------------------------|----------------|----------------|
| ME1 | monocot 1a        | <i>Oryza sativa</i>           | rice           | monocot        |
| ME1 | monocot 1a        | <i>Zea mays</i>               | maize          | monocot        |
| ME1 | <b>monocot 1a</b> | <b><i>Sorghum bicolor</i></b> | <b>sorghum</b> | <b>monocot</b> |
| ME1 | monocot 1b        | <i>Zea mays</i>               | maize          | monocot        |
| ME1 | <b>monocot 1b</b> | <b><i>Sorghum bicolor</i></b> | <b>sorghum</b> | <b>monocot</b> |
| ME1 | dicot 1           | <i>Beta vulgaris</i>          | beet           | eudicot        |
| ME1 | dicot 1           | <i>Vitis vinifera</i>         | grape          | eudicot        |
| ME1 | dicot 1           | <i>Populus trichocarpa</i>    | cottonwood     | eudicot        |
| ME1 | monocot 1c        | <i>Oryza sativa</i>           | rice           | monocot        |
| ME1 | monocot 1c        | <i>Zea mays</i>               | maize          | monocot        |
| ME1 | <b>monocot 1c</b> | <b><i>Sorghum bicolor</i></b> | <b>sorghum</b> | <b>monocot</b> |
|     |                   | <i>Medicago truncatula</i>    | legume         | eudicot        |
| ME2 | <b>monocot 2</b>  | <b><i>Sorghum bicolor</i></b> | <b>sorghum</b> | <b>monocot</b> |
| ME2 | dicot 2           | <i>Medicago truncatula</i>    | legume         | eudicot        |
| ME2 | dicot 2           | <i>Arabidopsis thaliana</i>   | thale cress    | eudicot        |
|     |                   | <i>Beta vulgaris</i>          | beet           | eudicot        |
| ME3 | dicot 3           | <i>Medicago truncatula</i>    | legume         | eudicot        |
| ME3 | dicot 3           | <i>Arabidopsis thaliana</i>   | thale cress    | eudicot        |
| ME3 | monocot 3         | <i>Oryza sativa</i>           | rice           | monocot        |
| ME3 | <b>monocot 3</b>  | <b><i>Sorghum bicolor</i></b> | <b>sorghum</b> | <b>monocot</b> |

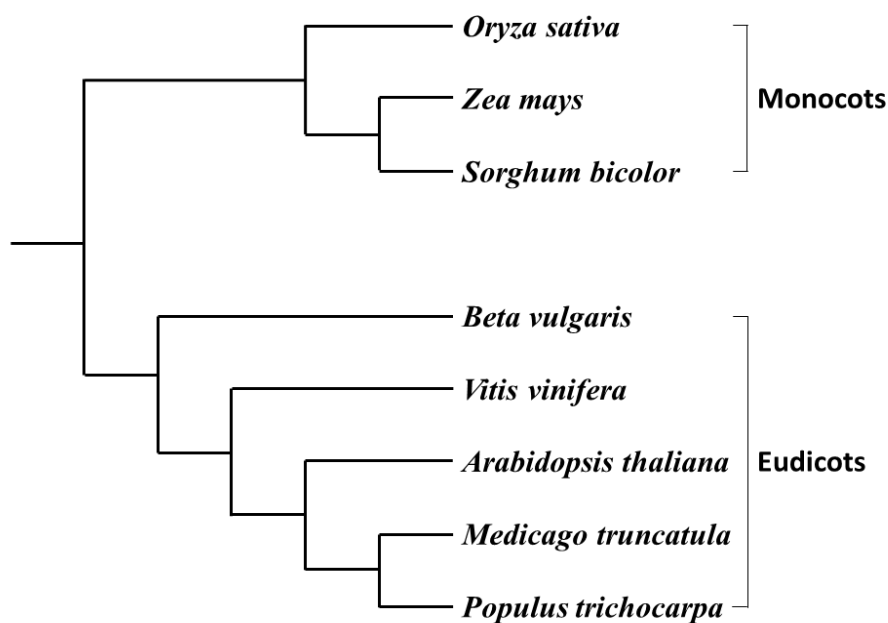

Species phylogeny (APG III system)

Fig. S8

```
SINE2_consensus TCGGCCTGGGTGAGAAGGTCACCTTCTTCTTAATAYAATRCC--CGGGGGCNGTCTTWCCCCTCCSC--GGTCGAGTTT
ZmSINE2.1      ...a...t.....-----C...G...---...t...A.....G.a.....
SINE2-1a_SBi   ...a...c.....-----gC...G...---...t...A.....G.a.....ttttt
SINE2-1c_SBi   .g...t.....-----g.tC.aG...---...gc.g.g.....G.a...c...tt
SINE2-1_SBi    .....-----t.....tTg.aAg.tg...c...a.....aa.g.C.....ttttt
ZmSINE2.2      ...t.g...ctcog.tt-g.g.....T...A.-gt...g...T...a.....c.....
ZmSINE2.3      .....g...acc.ttgtt.ggtc.....T...A.-gg.a...g...T.....C...c.....
ZmSINE3        c.c.gg.tc.a.togc.....aa.....gtg.aAagtca...ac...cT...t-----aaaaa
```

Fig. S9

```
Monocot 1a      CTATTTTAGACCTTT|TTTCT-CTTCTYTTAATAAATG---ATAGGCAG---CTCTCCTGCGTGTTCGAGAAAAAAAA-3'
                ||| ||| ||| ||| ||| ||| ||| ||| ||| ||| ||| ||| ||| ||| ||| ||| ||| ||| ||| ||| ||| |||
LINE1-1_ZM     CTATTTTAGACCTTAT|TATCTCCTTCT--TAATATATTT--AAGGCAG---TTCCCTGCGCTTTCGAGAAAAAAAA-3'
                | || || ||| ||| ||| ||| ||| ||| ||| ||| ||| ||| ||| ||| ||| ||| ||| ||| |||
SINE2_consensus GGCCTGGTGAGAAGG|TACCTTCTTCT--TAATAYAATRCCGGGGCNGTCTTWCCCTCCSCGGTCGAGTTT-3'
```

L1 consensus  
(monocot 1a)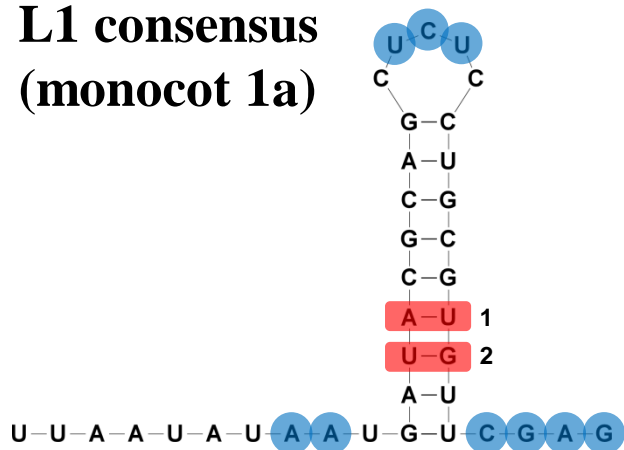

## LINE1-1\_ZM

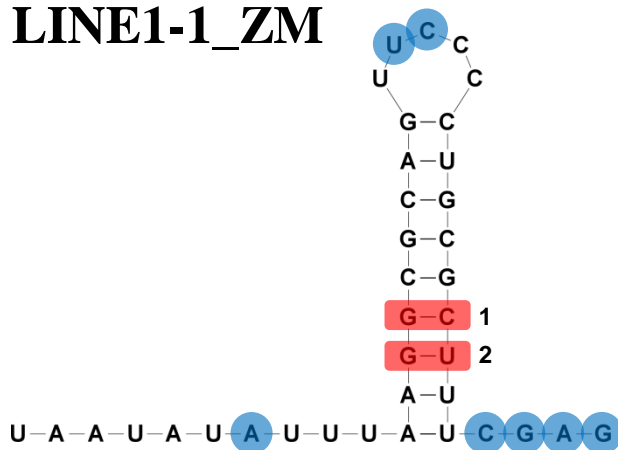

## ZmSINE3

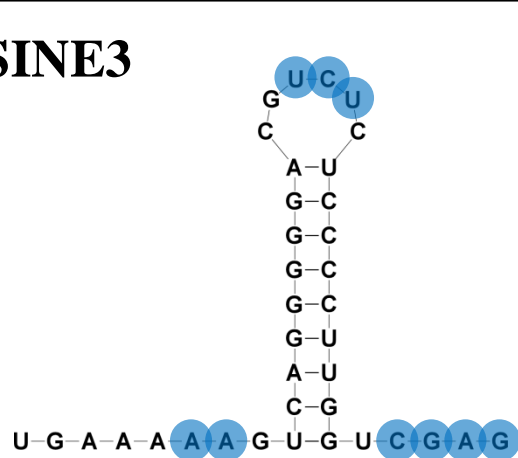

## ZmSINE2.2

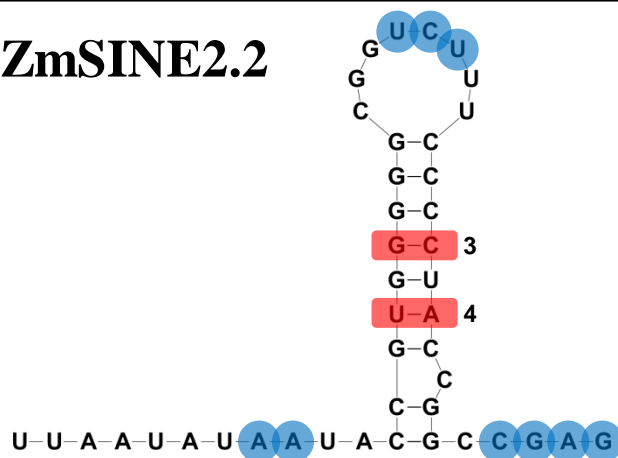

## ZmSINE2.3

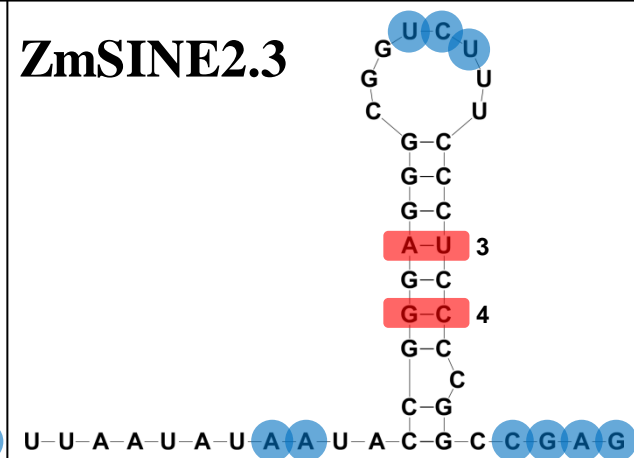

## SINE2-1\_SBi

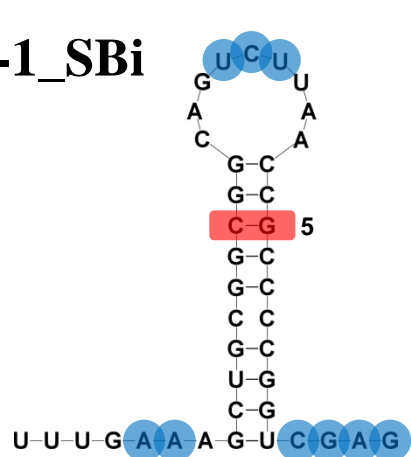ZmSINE2.1/  
SINE2-1a\_SBi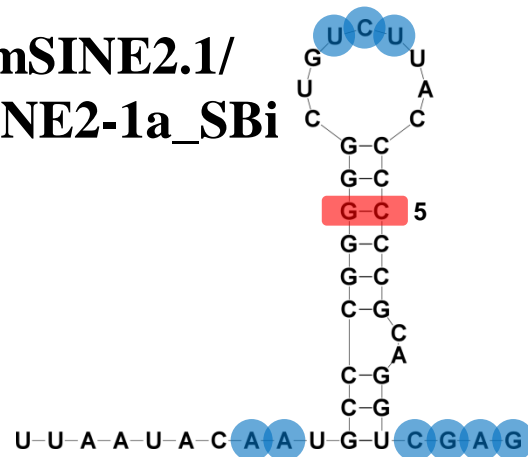

## SINE2-1c\_SBi

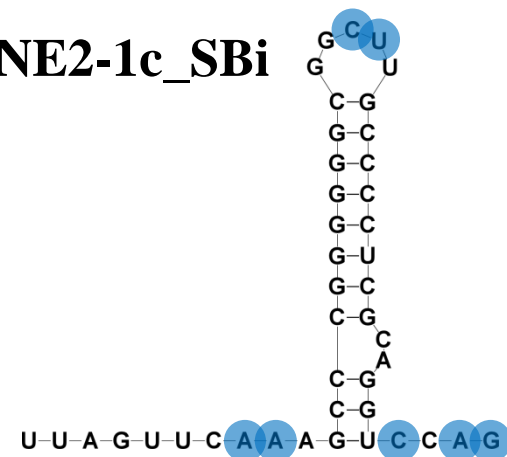

Fig. S11

```

                                Box A
SINEX-3_CR  --GGGGGGGTCGTCTAAATGGTTAAGACACTCA-AGCCGATTTGTTAAGGCTTCGAGAG
L1-1_CR     CACAGCGCGTCTTGCAGCGGGCTGGAGCCCGTTAGTCAGCGCCACATCTGGCCCGTTTA
                * * *** * * ** * * * * * * * *
                                Box B
SINEX-3_CR  ATCCTGGGTTCGAATCCCGGTCACCCACCAGGAAGGGCCCTGGTTTACAAAACCCATC
L1-1_CR     GTTTCTGCTTGTGTCTCCTCTGCCGTTCTCCTGGGGTGTGCTTAAGCAACCGACTTG
                * * * * * ** * * * * * * * * * * *
SINEX-3_CR  CACACCTTGGTGGTGTGTAGAC----CCCCCTGTGGTGCAGGGAGTCTCTGGGGTACAA
L1-1_CR     TGGGGTGGGGTGGGTTTGGCGGGGCGAGTGCGTAGCGCTGGTGTTCCTTTCTTTCTGGCG
                * * * * * * * * * * * * * * * * *
SINEX-3_CR  GGCTGGAGCTCTGGGCCT-GCAACTGGAGAGCTTTCAAGTTCAAGATCCAAGATTCAAGT
L1-1_CR     CGCGGTGGTGGTGGTTCTTGCGGTTAG---GCTGTGGTGT---AGGTTGGTGTGGGTT
                ** * * *** ** * * * * * * * * * * *
SINEX-3_CR  GGAGCTCTGGGCCTGTCAACTGGAGAGCTCTAGATGATCTGTGTGGTGCATGGCAGTGGCT
L1-1_CR     AGGTCCTGGCGGTGTTTTTGTGCAACCCCTCCCGGGGGCGGGGGGGCCA-GCCTCCTGCT
                * ** * * * * * * * * * * * * * * * *
SINEX-3_CR  GTAGTTGTCACCTAGCTGTTGAGAACTCCAGTAGGTGTGTGGTGCACCTGGCTGTTGAG
L1-1_CR     CTGTCTGCCGGTCCGGGTGGGGTGGGGTGG---GATGGATGGGGGTGGTGGTGGC---G
                * ** * * * * * * * * * * * * * * * *
SINEX-3_CR  GTTCCAGTAGGTGTGTGGTGAACAAAACCTTCTTCTTCTTCTGATCTCTGGCCCT
L1-1_CR     GTTTTCG---AGGTGTTTGTCTTC-TGTTTTCTTCTTTTCTTCTCT---TCTTGCCT
                *** * * * * * * * * * * * * * * * *
SINEX-3_CR  ATCGAGTTCTG-TGATATGATCCAGGCTGCCTT---GGCAGTAGGGTGGTAGTGCCTTA
L1-1_CR     GTCAGGTTCTGGTCTCGGGGACCAGGCTGCTTTCAGGCAGCAGGGGGCAGCGCTCTG
                ** * * * * * * * * * * * * * * * *
SINEX-3_CR  CCACCG--CAACCTTGTAAGGATGACT--TTAAAAAAAAAAA
L1-1_CR     CCCCTGTTCAACCTTGTAAGGATGATTCTCAAAAAAAAAAAA
                ** * * * * * * * * * * * * * * * *

```
